# Supplementary material for: Functional features defining the efficacy of cholesterol-conjugated, self-deliverable, chemically modified siRNAs
Source: PubMed Central journal article supplement (PMC6237813; doi:10.1093/nar/gky745), 2018-08-29
Supplement: gky745_supplemental_files.pdf [file gky745_supplemental_files.pdf]

**Supplementary Table 1. Sequence and functionality information for all sdRNAs.**

Listed in the table are the 50-nt target sequences containing the flanking regions and the corresponding sdRNA efficacy values, obtained in the functional screenings.

**Supplementary Table 2. Sequence and modification pattern of sdRNA in Figure 6.** The demonstrated sequences differ only in the chemical modification of position 14 in the antisense strand.

**Supplementary Figure 1. Characterization of datasets.** (A) The distribution of GC content of the siRNA-targeting region of 356 sdRNAs targeting 17 genes. (B) The distribution of the GC content of the siRNA-targeting regions of 2385 siRNAs, the efficacy of which is depicted in C. (C) The efficacy of 2385 siRNAs evaluated using an eCFP-eYFP dual reporter assay. Data from Huesken et al., 2005. Functionality cutoffs indicated.

**Supplementary Figure 2. Algorithm performance visualized as ROC curves.**

Using linear regression analysis (R 3.4.1), the scoring algorithm was generated for positional preference matrices shown in Figure 2A. Black line shows performance of the control algorithm (see Methods). Area under the curve (AUC) for each curve is indicated.

**Supplementary Figure 3. 2'-O-methyl modification at position 14 of the antisense strand negatively modulates sdRNA efficacy.**

(A) The frequency of 2'-O-methyl modification per position of the antisense strand in functional (defined as < 24% gene expression remaining) sdRNAs. (B) The frequency of 2'-O-methyl modification per position of the antisense strand in non-functional (defined as > 44% gene expression remaining) sdRNAs. (C, D) The efficacy of sdRNA targeting MAP4K4 with and without 2'-O-methyl modification in position 14 of the antisense strand (qPCR, 72 hours, n=3, SD, one-way ANOVA  $p < 0.05$ ). Different chemical modification patterns used in C and D, but within the graphs, only the position 14 modification differs.

# Supplementary Figure 1

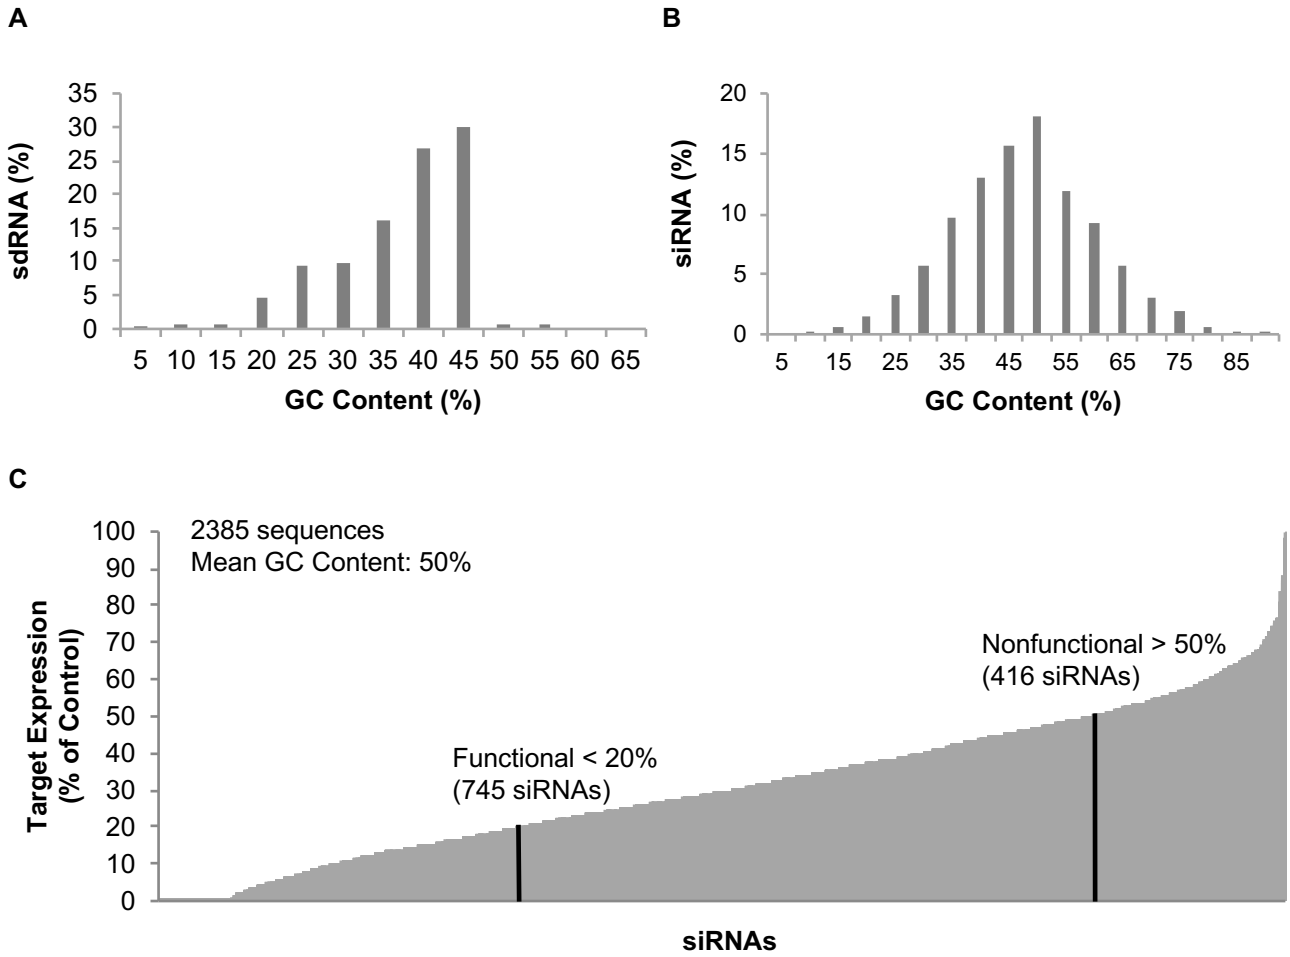

Supplementary Figure 2

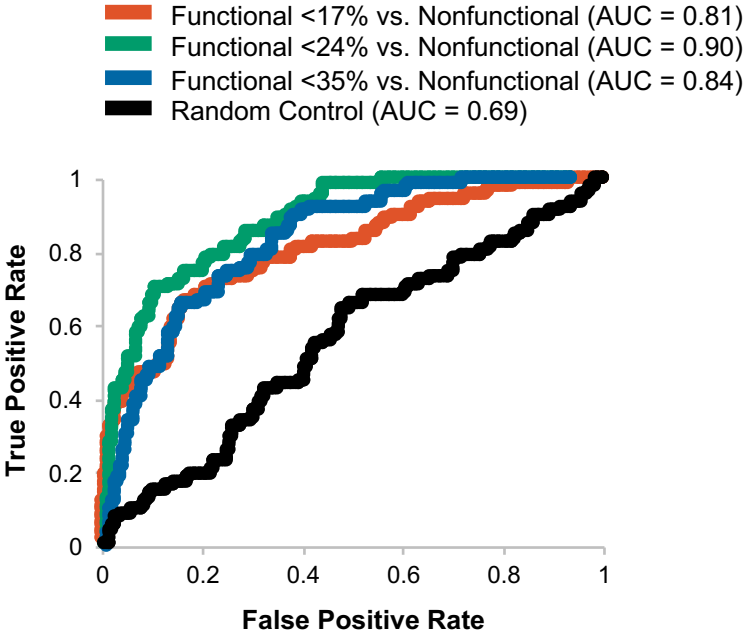

Supplementary Figure 3

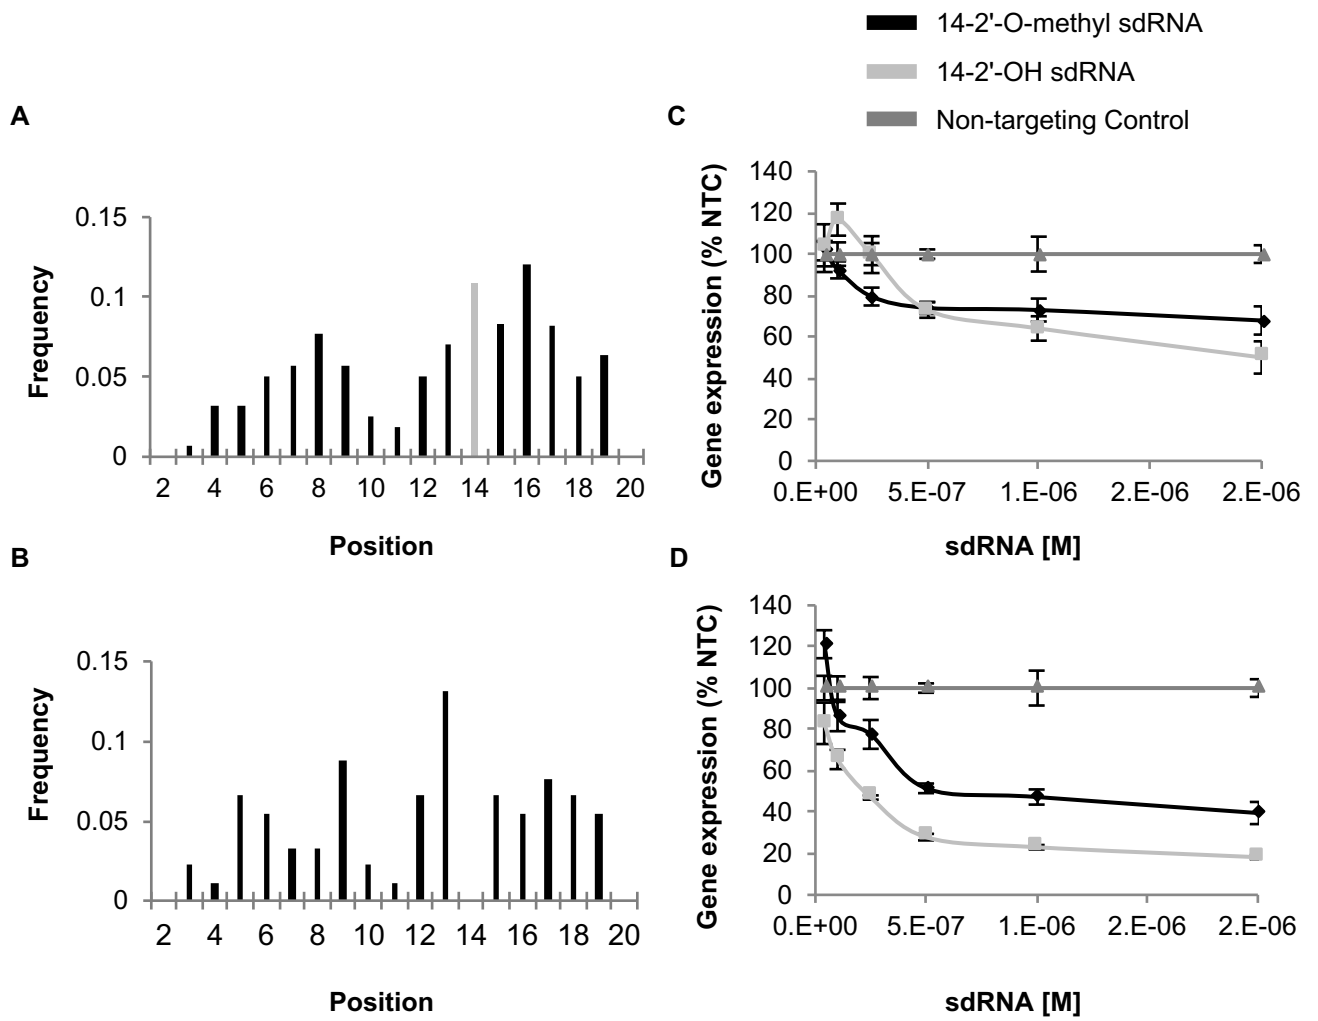

## Table of Contents

Supplementary Table 1  
Supplementary Table 2

S2-S10  
S11

**Supplementary Table 1.** Sequence and functionality information for all sdRNAs.

| ID   | 5' Region - <b>siRNA Targeting Region</b> - 3' Region <sup>1</sup>           | Target Expression (% of Control) | Standard Deviation <sup>2</sup> |
|------|------------------------------------------------------------------------------|----------------------------------|---------------------------------|
| 1000 | UUUCCUUGGCUUUUAUG <b>CACAUUAAACAGAUGUGAAU</b> UUCGUUUAAACUG                  | 17.10                            | 1.85                            |
| 1001 | AAGAAAUCUCGGAUUGAUC <b>UAAUGAAGGUUUUAAGCAUU</b> UCCACAGCCA                   | 6.50                             | 0.69                            |
| 1002 | CAAGCACAUUGGAAGAUG <b>CUUUUGUUUUGUGAGGUAAU</b> AAACAUGUGAGGAU                | 3.49                             | 0.25                            |
| 1003 | AUUUGUGGUUAUACUG <b>UUGGCAUGUAUCUACUUGAG</b> CUAUUACUUCAGCC                  | 4.61                             | 0.37                            |
| 1004 | AAUGUACUGAAAUUAA <b>AGGAGGAAGAUAAACAAAAU</b> UUAACAAUGCUGA                   | 5.07                             | 0.08                            |
| 1005 | GUUUUUGUGUAUUUG <b>UUAUUGGUUUGAAUUA</b> AAACACUAUUGGCAGUGU                   | 5.70                             | 0.31                            |
| 1006 | CCUGGCAACUGAGA <b>ACAAAGCAACAAGCAACUGAAU</b> CUCAUUUCUUCAGC                  | 5.79                             | 0.43                            |
| 1007 | AUUCUAGGCGAUCG <b>CGUGCUCGAUGAGUUAGA</b> AACUUUGAGCAAGUUA                    | 7.81                             | 1.39                            |
| 1008 | UAUUGAAUUCGGAAC <b>UGUCCUUCUUGGCUUUUAUG</b> CACAUUAAACAGAU                   | 8.21                             | 0.31                            |
| 1009 | AAUCCAGAACUAGUG <b>AAAUUAAGGAAAGAAUACU</b> UAUGAAUUCAAGACC                   | 8.45                             | 0.65                            |
| 1010 | UGUCCUUUCUUGG <b>CUUUUAUGCACA</b> UUA <b>AAACAGAUGUGAAU</b> UUCGUUUA         | 8.69                             | 0.37                            |
| 1011 | CAUCAUCA <b>AAGAGAU</b> CGU <b>UAGCAGAAACAAAAGG</b> AGAUUCAAGAGGAUG          | 8.93                             | 0.53                            |
| 1012 | UUA <b>AUGUAUAGAUUUGA</b> AG <b>AAGAGCUGUUUCUG</b> AGGAGCCUUCAGGAUUA         | 10.31                            | 0.93                            |
| 1013 | GCUUGCUCUUGUCA <b>UCUCUUUGAUUAU</b> UCCUG <b>AAGGUGCAACA</b> AUCAUU          | 10.33                            | 0.46                            |
| 1014 | AAGGGAUCCCCU <b>UCCUGUGGUUCUAUU</b> AU <b>UUUAAUUA</b> AAUUAUAAUUAUUAAU      | 10.40                            | 0.34                            |
| 1015 | CGAUGAGUUAGA <b>AGACUUUGAGCAAGU</b> UACUGUGAGUAUGUAAUACGCA                   | 10.97                            | 3.08                            |
| 1016 | GCUGCCAAGAGUGC <b>UCGAGAUUUGGACCUAAG</b> AGACGGACCUGGACCCCC                  | 11.28                            | 0.30                            |
| 1017 | CAGGAAGCAAGUUU <b>UUCUGUCAGGAAACA</b> AUGUUGGCUUCUGUUGACCU                   | 11.68                            | 0.75                            |
| 1018 | AGGCGCUAUGUA <b>UUUUAUUUAGCUACC</b> UGU <b>AAAGAAU</b> CACCUGGAUUA           | 11.74                            | 0.51                            |
| 1019 | AUUGAAUUCGGAAC <b>UGUCCUUCUUGGCUUU</b> AUGCACA <b>UUAACAGA</b> UG            | 11.97                            | 0.85                            |
| 1020 | GAAGAU <b>CACCCUCCU</b> U <b>AAAUUUUCCGCAUU</b> ACAUGAGCGAGCACUUGC           | 12.73                            | 1.17                            |
| 1021 | UAAUUCUAGGCGAUC <b>GCAUU</b> AUG <b>UCAGAAUU</b> AAAAAAAAUUCUUUAACUUA        | 12.86                            | 1.66                            |
| 1022 | GUA <b>AUACGCACUGAC</b> CCA <b>UAUGUCCACCCAU</b> UGAUGUGAUUUUUAGCAU          | 13.07                            | 2.91                            |
| 1023 | CACAUGGAAGAUGC <b>UUUGUUUUGUGAGGUAAU</b> AAACAUGUGAGGAUGAAA                  | 13.07                            | 4.16                            |
| 1024 | GAAGAGCUGUUUC <b>UGAGGAGCCUUCAGGAU</b> UACAAGAUUCAAGUGCGCU                   | 13.28                            | 0.83                            |
| 1025 | UUGUACAGAAU <b>UUUCUAUUGAAUUCGGAAC</b> UGUCCU <b>UUCUUGGCU</b> UUA           | 13.50                            | 1.77                            |
| 1026 | GACAAGGGAUCCCC <b>UCCUGUGGUUCUAUU</b> AU <b>UUUAAUUA</b> AAUUA               | 13.57                            | 1.63                            |
| 1027 | UCGGAACUGUCCU <b>UUCUUGGCUUU</b> AUGCACA <b>UUAACAGA</b> UGUGAAUUAU          | 13.92                            | 1.26                            |
| 1028 | GGAACUGUCCU <b>UUCUUGGCUUU</b> AUGCACA <b>UUAACAGA</b> UGUGAAUUAUUC          | 13.93                            | 0.88                            |
| 1029 | GCAUUGCCC <b>UCAACGACCACUUUGUCAAGC</b> UCAUU <b>UCCUGGUAUGACA</b> AC         | 14.39                            | 0.01                            |
| 1030 | UAUCCAACA <b>AUUAUCGCUUGUAUUACCGAGU</b> AAUGAUCUUAUUAAACAA                   | 14.51                            | 1.74                            |
| 1031 | GGUGACA <b>UCAAGUAGAGUUCU</b> UCCACA <b>AAACAGAACA</b> AGAUGCUCAAAAA         | 14.64                            | 0.17                            |
| 1032 | UUUAA <b>CUCAAU</b> UUU <b>UCCAUGAAAUGCAACA</b> CAUGUAUAAU <b>UUUUUA</b>     | 14.85                            | 0.53                            |
| 1033 | CCCUCAACGACCACU <b>UUGUCAAGCUC</b> AUU <b>UCCUGGUAUGACA</b> ACGAAUUU         | 14.87                            | 1.03                            |
| 1034 | AAUGUCCGUUCGGU <b>UGGAGAGCUAUGAAACGAU</b> AUGGGCUGAAUACAA                    | 15.13                            | 0.50                            |
| 1035 | GGGCU <b>GCUUUUAA</b> CU <b>UGGUA</b> AAAGUGGAU <b>AUUGUUGCCA</b> UCAUGACCCC | 15.22                            | 0.15                            |
| 1036 | CCACCAU <b>AUGAAUUGUACAGAAU</b> AUU <b>UCUAUUGAAU</b> UCGGAACUGUCCUU         | 15.34                            | 0.89                            |
| 1037 | GAUAACCGGGAGAU <b>AGUGAUGAAGUACA</b> UCCA <b>UUAUAAGCUGUCGCAGAG</b>          | 15.41                            | 1.14                            |
| 1038 | GAGGCGAACUGUGUG <b>AGAGGUCCUAUGAU</b> UAUGUCCGGUUAUGUAAAC                    | 16.06                            | 1.80                            |

|      |                                                     |       |      |
|------|-----------------------------------------------------|-------|------|
| 1039 | GAGGCGCUAUGUAUUAUUUAUAGCUACCUGUUAAGAAUCACCUGGAUU    | 16.13 | 0.93 |
| 1040 | ACAAGGGAUCCCCCUUCCUGUGGUUCUAUUUAUUUAUUAAUUAA        | 16.75 | 0.85 |
| 1041 | CUGUCCUUUCCUUGGCCUUUAUGCACAUAUAACAGAUGUGAAUUAUCGUUU | 16.86 | 0.94 |
| 1042 | CUUUAAACUUACUAAAAACACUAUCCAACAUAUAUCGCUUGUAUUACCGA  | 17.17 | 1.96 |
| 1043 | UGAAUUGUACAGAAUUAUUUCUAUUGAAUUCGGAACUGUCCUUCCUUGGC  | 17.31 | 1.96 |
| 1044 | UGUCAUCUCUUUGAUUAUUAUCCUGAAGGUGCAACAUAUUUGAAAAGGC   | 17.84 | 0.55 |
| 1045 | CAUUGACCUCAACUACAUGGUUUACAUGUCCAAUAUGAUUCCACCCAUG   | 18.06 | 1.04 |
| 1046 | CGUCAUGGGUGUGAACCAUGAGAAGUAUGACAACAGCCUCAAGAUCAUCA  | 18.09 | 1.81 |
| 1047 | AAUGUUUACUACACUCGGAUUAUUUGAUUUGGAAUUCGAGUCGUCUUA    | 18.13 | 1.38 |
| 1048 | UUUCGAGUCGUCUUAUUGUAUAGAUUUGAAGAAGAGCUGUUUCUGAGGAG  | 18.16 | 0.62 |
| 1049 | ACGACCACUUUGUCAAGCUCUAUUCCUGGUAUGACAACGAAUUUGGCUAC  | 18.18 | 0.74 |
| 1050 | UGUCCACCCAUUGAUUGUGAUUAUUUAGCAUUUUGAAAGUUGUUGAAACAG | 18.27 | 2.27 |
| 1051 | GAUUGACAAAUACGAUUUAUCUAAUUUACACGAAUUGCUUCUGGUGGCG   | 18.28 | 0.31 |
| 1052 | CAGGAAAACAAUGUUGGCCUUCUGUUGACCUUUAUUGAUUGUCUGAACAC  | 18.73 | 2.42 |
| 1053 | UCACCAGGGCUGCUUUUAACUCUGGUAAGUGGAUUAUUGUUGCCAUCAAU  | 18.93 | 1.50 |
| 1054 | UGGAUUUCGAGUCGUCUUAUUGUAUAGAUUUGAAGAAGAGCUGUUUCUGA  | 19.12 | 0.85 |
| 1055 | CAUUCAAAUGAAAAUAUUUUUAGCACUGACUGAAGAACUCUUGGGACAA   | 19.32 | 2.88 |
| 1056 | UCCCUCAGCCAUUGCCUGUGUGUGGUGACAUAAGUAGAGUUCUUCAC     | 19.51 | 0.50 |
| 1057 | UGACCUCAACUACAUGGUUUACAUGUCCAAUAUGAUUCCACCCAUGGCA   | 19.52 | 1.00 |
| 1058 | AAGUUAUUUUUAUGCCUUUAUUUCUUAACAAAUGUAUGAUUACAUCA     | 19.66 | 0.44 |
| 1059 | AUGAUGUAGUAAGGUUUUUGGAUUCAAAGCAUAAAACCAUUACAAGUA    | 19.68 | 6.62 |
| 1060 | UGUACAGAAUUAUUUCUAUUGAAUUCGGAACUGUCCUUUCCUUGGCUUAU  | 19.87 | 2.37 |
| 1061 | GGAGCCGCACCUUGUCAUGUACCAUCAUAAGUACCCUGUGCUCAACCA    | 19.89 | 1.42 |
| 1062 | GCUGGUGACAUUUGUGGUUAUACUGUUGGCAUGUAUCUACUUGAGCUAUU  | 19.99 | 1.75 |
| 1063 | UUCGAGAGAAGAAAUCUCGGAUUGAUCUAAUGAAGGUUUUAAGCAUUU    | 20.16 | 1.98 |
| 1064 | CCUCCCCUCAACCCACCAUAUGAAUUGUACAGAAUAUUUCUAUUGAAU    | 20.37 | 0.60 |
| 1065 | GUGGAAAUGGAAGUCUUUGUGAUCAGGAAUUCGAUAGCAUUUGUAGUAU   | 20.44 | 1.53 |
| 1066 | GUAUGAGACGUUUUAUAGCCGAAUUGAUCUUUCAAGUUAUUUUUAUGCC   | 20.57 | 0.74 |
| 1067 | CAUGUUCGUAUGGGUGUGAACCAUGAGAAGUAUGACAACAGCCUCAAGA   | 20.58 | 1.11 |
| 1068 | GGUGAAGGUCGGAGUCAACGGAUUUGGUCGUUUGGGCGCCUGGUCACCA   | 20.66 | 2.89 |
| 1069 | UUGACAAGGAUGGAUGGCUACAUCUGGAGACAUAAGCUUACUGGGACGAA  | 21.29 | 1.03 |
| 1070 | GACAAUACGAUUUAUCUAAUUUACACGAAUUGCUUCUGGUGGCGCUCC    | 21.44 | 2.36 |
| 1071 | UAUAUAUUAUUUAUUUGAUAGUAUUGUGCAUAGAGCCACGUAUGUUUUU   | 21.57 | 0.38 |
| 1072 | AUUGUACAGAAUUAUUUCUAUUGAAUUCGGAACUGUCCUUUCCUUGGCUUU | 21.63 | 2.94 |
| 1073 | GAACCGCUGGAGAGCAACUGCAUAAGGCUAUGAAGAGAUACGCCUGGUU   | 22.24 | 0.87 |
| 1074 | UAGGGAGCCGCACCUUGUCAUGUACCAUCAUAAGUACCCUGUGCUCAA    | 22.55 | 0.80 |
| 1075 | UAUUGCUAUGGGAUUUCUGCGAGAAAGACUUGAAGGUGUAUACAGGAACA  | 22.68 | 0.23 |
| 1076 | GAUAUUUGAUUUGUGGAUUUCGAGUCGUCUUAUUGUAUAGAUUUGAAGAA  | 22.93 | 0.88 |
| 1077 | GGUGUAUACAGGAACAUAUUGAUGAUGUAAGGUUUUUUGGAUUCAAA     | 23.15 | 1.04 |
| 1078 | CAACUACAUGGUUUACAUGUCCAAUAUGAUUCCACCCAUGGCAAAUUC    | 23.17 | 2.31 |
| 1079 | AAAGCACUCUGAUUGACAAUACGAUUUAUCUAAUUUACACGAAUUGCU    | 23.18 | 1.25 |
| 1080 | UGAUAAACAGCGUGGGGUGCUCUCAAUGACUCAACACGCCUCAUCCUCU   | 23.32 | 1.44 |

|      |                                                      |        |      |
|------|------------------------------------------------------|--------|------|
| 1081 | GGGACAAGGGAUCCCCUCCUGUGGUUCUAUUUAUUUAUUAAUUAUUAAU    | 23.38  | 1.76 |
| 1082 | UUUCUGAGGAGCCUUCAGGAUUACAAGAUUCAAGUGCGCUGCUGGGUGCC   | 23.55  | 1.56 |
| 1083 | UACGAUAACCGGGAGAUAGUGAUGAAGUACAUCCAUUUAAGCUGUCGCA    | 23.57  | 1.38 |
| 1084 | UCAUUUCCUGGUUUGACAACGAAUUUGGCUACAGCAACAGGGUGGUGGAC   | 23.69  | 0.65 |
| 1085 | CAUGGGUGUGAACCAUGAGAAGUAUGACAACAGCCUCAAGAUAUCAGCA    | 23.72  | 2.67 |
| 1086 | CUUUUAACUCUGGUAAAGUGGGAUUAUGUUGCCAUCAAUGACCCCUUCAUU  | 23.74  | 1.12 |
| 1087 | UCAACGACCACUUUGUCAAGCUCAUUCCUGGUUUGACAACGAAUUUGGC    | 23.82  | 1.66 |
| 1088 | AGGGAUCCCCUCCUGUGGUUCUAUUUAUUUAUUAAUUAUUAAUUAUUAAUUA | 23.90  | 0.93 |
| 1089 | CUUCGCCAAAAGCACUCUGAUUGACA AAUACGAUUUAUCUAAUUUACACG  | 23.91  | 0.48 |
| 1090 | CCAGGGCUGCUUUUAACUCUGGUAAAGUGGGAUUAUGUUGCCAUCAAUAGAC | 23.91  | 1.62 |
| 1091 | ACCACCAGCCCAGCAAGAGCACAAGAGGAAGAGAGACCCUCACUGCU      | 24.57  | 2.65 |
| 1092 | GCUGGGCAAAGAAGUCCUACGGAGUACCUAGAAAAUUAGUACAAAGCA     | 24.63  | 4.19 |
| 1093 | ACAAAAAUGAUUCUUGACA AAAGCAAACAAGACAAGGCCAACCGAUACUU  | 24.84  | 1.49 |
| 1094 | GAAGGUGAAGGUCGGAGUCAACGGAUUUGGUCGUUUGGGCGCCUGGUCA    | 25.13  | 1.71 |
| 1095 | GAAUUGUACAGAAUAUUUCUAUUGAAUUCGGAACUGUCCUUUCCUUGGCU   | 25.405 | 1.82 |
| 1096 | UCAAGCUCAUUUCUGGUUUGACAACGAAUUUGGCUACAGCAACAGGGUG    | 26.66  | 0.44 |
| 1097 | UAUAAAGUCCUUGAUUCUGUGUGGGUUC AAACACAUUUCAAAGCUUCAGG  | 26.79  | 0.52 |
| 1098 | CAAUCAUCCAAAAAUAUUUAUCAUGGAUUCUAAAACGGAUUACCAGGGA    | 26.85  | 2.21 |
| 1099 | CUAUGAAACGAUAUGGGCUGAAUACA AAUCACAGAAUCGUCGUAUGCAGU  | 26.93  | 1.38 |
| 1100 | GGAUGCAGCAUUUAUGAUGUGGGUCAAGGAAUUAAGUUAGGGAAUGGCACA  | 27.73  | 1.07 |
| 1101 | UUGCUUUUAAUUAAAUGGUCUUGUUAGAAAACAAGCUUUUUUGUAUUGG    | 27.86  | 4.32 |
| 1102 | GCCUAGGGAGCCGCACCUUGUCAUGUACCAUCAAUAAAGUACCCUGUGCU   | 27.91  | 2.12 |
| 1103 | CGUGAGUCCCAUCCCAACUCCUUGAUGAAGAAGAUCACCCUCCUUAUU     | 28.07  | 1.36 |
| 1104 | CUCAAGACCCUUCGUUCUUAACCACGUUCUUGAAAUCAGGGUCCCCAA     | 28.47  | 0.14 |
| 1105 | GGGUGUGAACCAUGAGAAGUAUGACAACAGCCUCAAGAUAUCAGCAAUG    | 28.58  | 0.86 |
| 1106 | UGUUGGUGGAUGAGCAAGAGACCUUGCUUAUUAGAAACAAGUUUAAACU    | 28.61  | 3.52 |
| 1107 | UUAACUCUGGUAAAGUGGGAUUAUGUUGCCAUCAAUAGACCCCUUCAUUGAC | 29.2   | 0.42 |
| 1108 | CGAUAAACCGGGAGAUAGUGAUGAAGUACAUCCAUUUAAGCUGUCGCAGA   | 29.30  | 1.61 |
| 1109 | GAAACAGGAAGCAAGUUUUUCUGUCAGGAAAACAUGUUGGCUUCUGUUG    | 29.38  | 1.65 |
| 1110 | UGCCAUCAAUAGACCCCUUCAUUGACCUCAACUACAUGGUUUACAUGUUC   | 29.41  | 0.76 |
| 1111 | GUCUGACAACCUCUUGGUGAACCUUAGUACCUAAAAGGAAAUCUCACCCC   | 29.63  | 0.65 |
| 1112 | GGGGAGGAGGAUGGGGAGUAGGACAUAACAGCUUAGAUUUUAAGGUUUUU   | 29.76  | 3.76 |
| 1113 | UUUCCUGGUUUGACAACGAAUUUGGCUACAGCAACAGGGUGGUGGACCUC   | 29.81  | 1.07 |
| 1114 | AUCCAUCACGGUUUUGGAAUGUUUACUACACUCGGAUUAUUUGAUUGUG    | 30.00  | 1.74 |
| 1115 | GGUGCCCACACUAUUUAGCUUCUUCGCUAAGAGCACUCUCAUCGACAAGU   | 30.22  | 7.81 |
| 1116 | CCUCAACUACAUGGUUUAUCAUGUCCAUAUUGAUUCCACCCAUGGCAAAU   | 31.13  | 0.62 |
| 1117 | GUUUCUGUGCAGCAUCAAUUCAGGCGUCCUGAAAAUAGACAGCACC AUCC  | 31.19  | 0.49 |
| 1118 | AACCUGCCAAAUAUGAUGACAUCAAGAAGGUGGUGAAGCAGGGCUGCGGAG  | 31.49  | 5.80 |
| 1119 | GAGCAAGUUACUGUGAGUAUGUAAUACGCACUGACCCAUAUGUCCACCCA   | 31.53  | 2.10 |
| 1120 | AUUCUAGGCGAUCGCACGUUAUUGCAGAAAUCAAAUAGAUUCAACAUAGA   | 31.55  | 3.50 |
| 1121 | CUUCAUUGACCUCAACUACAUGGUUUACAUGUUCCAAUAUGAUUCCACCC   | 31.58  | 1.41 |
| 1122 | UAACCGGGAGAUAGUGAUGAAGUACAUCCAUUUAAGCUGUCGCAGAGGG    | 32.00  | 3.63 |



|      |                                                     |       |      |
|------|-----------------------------------------------------|-------|------|
| 1123 | AACCGGGAGAUAGUGAUGAAGUACAUCCAUUUAAGCUGUCGCAGAGGGG   | 32.01 | 4.81 |
| 1124 | UCAACCCACCAUAUGAAUUGUACAGAAUUAUUCUAUUGAAUUCGGAACU   | 32.21 | 1.45 |
| 1125 | CCCAGCCAAACCCUGUCUGACAACCUCUUGGUGAACCUUAGUACCUAAAA  | 32.21 | 1.40 |
| 1126 | GGGCUGGCAUUGCCCUCAACGACCACUUUGUCAAGCUCAUUUCCUGGUAU  | 32.22 | 2.13 |
| 1127 | UUGCGCCCGCGAACGACAUUUUAUAUGAACGUGAAUUGCUCACAGUAUG   | 32.23 | 0.64 |
| 1128 | UCGAAAUGUCCGUUCGGUUGGCAGAAGCUAUGAAACGAUAUGGGCUGAAU  | 32.38 | 0.48 |
| 1129 | GCUAUCCAGCUAUUUUUUAUUUGUUUGUCAUUUGGGGGAAUUCAUCUCU   | 32.58 | 0.80 |
| 1130 | GCUGCAAAGAUCUCAACGUGCAAAGAAGCUACCGAUCAUACAAAAGA     | 32.62 | 5.83 |
| 1131 | CUUUCACGAUUGAAGUAUUUAUUCUUGCUCAGUAACGGUCUUUAUUACAAA | 32.94 | 1.72 |
| 1132 | UCUAUAUAAAGUCCUUGAUUCUGUGGGUUCAAACACAUUUCAAAGCUU    | 33.28 | 1.56 |
| 1133 | UGAAGAGAUACGCCUGGUUCCUGGAACAAUUGCUUUUACAGAUGCACAU   | 33.79 | 1.79 |
| 1134 | GGCCAAGGUCAUCCAUGACAACUUUGGUAUCGUGGAAGGACUCAUGACCA  | 33.81 | 1.72 |
| 1135 | CGGAUAUUUGAUUUGUGGAAUUCGAGUCGUCUUAUGUAUAGAUUUGAAG   | 34.21 | 0.50 |
| 1136 | GUUCGUCAUGGGUGUGAACCAUGAGAAGUAUGACAACAGCCUCAAGAUCA  | 34.64 | 1.16 |
| 1137 | GUCUAGAAAAACCGCCAAAUUGAUGACAUCAAGAAGGUGGUGAAGCAG    | 34.94 | 4.70 |
| 1138 | ACAUCAAAGUAGAGUUCUUCACAAACAGAACAAGAUGCUCAAAAAGGAC   | 35.01 | 1.47 |
| 1139 | GUGUAUUUGUUAUUGGUUUGAAUAUAACACUAUAUGGCAGUGUCUUUCC   | 35.08 | 3.22 |
| 1140 | CUUAAACAAUUGUAUGAUUACAUCAAGGCUUCAAAAAUACUCACAUGGCU  | 35.22 | 1.09 |
| 1141 | CCUUCGAUAGGGACAAGACA AUUGCACUGAUCAUGAACUCCUCUGGAUCU | 35.30 | 2.01 |
| 1142 | CAAUGACCCCUUCAUUGACCUCAACUACAUGGUUUACAUGUUCCAAUAUG  | 35.31 | 1.52 |
| 1143 | CUGGAACAAUUGC UUUUACAGAUGCACAUUUCGAGGUGGACAUCACUUC  | 35.47 | 2.02 |
| 1144 | ACCCUGGGAGCUCUCCUUGGAACCAUUCUGAAAUUAUUUAAAGGGGUU    | 35.59 | 3.88 |
| 1145 | CAGGCACAGCCCCACCACAGGACUCAUGUCUCAUUGCCACAGUGAGCCC   | 35.77 | 2.23 |
| 1146 | ACCCUGGCCAAGGUCAUCCAUGACAACUUUGGUAUCGUGGAAGGACUCA   | 35.82 | 1.03 |
| 1147 | ACUUUGUCAAGCUCAUUUCUGGUAUGACAACGAAUUUGGCUACAGCAAC   | 35.85 | 1.18 |
| 1148 | GGAUACUGCGAUUUUAAGUGUUGUUCCAUUCACGGUUUUGGAAUGU      | 35.96 | 1.91 |
| 1149 | GUGAUGAAGUACAUCCAUUUAAGCUGUCGCAGAGGGGCUACGAGUGGGA   | 36.08 | 1.84 |
| 1150 | UGUGAACCAUGAGAAGUAUGACAACAGCCUCAAGAUCAUCAGCAAUGCCU  | 36.31 | 0.17 |
| 1151 | UUGUCAAGCUCAUUUCUGGUAUGACAACGAAUUUGGCUACAGCAACAGG   | 36.70 | 1.28 |
| 1152 | UGUGAGGGAUGUUUGGGAGAUGUAAGAAUUGUUCUUGCAGUUAAGGGUUA  | 36.72 | 1.60 |
| 1153 | ACUCUCGGACGAGUUUCUGUGCAGCAUCAAAUCAGGCGUCCUGAAAAUUG  | 36.83 | 1.17 |
| 1154 | UGAGCUCAAAGACCCUUCGUUCUUAACCACGUUCUUGAAAUCAGGGUCC   | 36.88 | 2.39 |
| 1155 | UCAAGUUAUUUUUAUGCCUUUAUUUCUUAACAAUUGUAUGAUUACAU     | 36.95 | 0.53 |
| 1156 | UUAUUGCUAUGGGAAUUCUGCAGAAAGACUUGAAGGUGUAUACAGGAAC   | 37.28 | 1.65 |
| 1157 | CCCUGACAAAAAUUGAUCUUGACAAGCAAACAAGACAAGGCCAACCGA    | 37.40 | 3.23 |
| 1158 | GGAAGCGACCAACGCCUUGAUUGACAAGGAUGGAUGGCUACAUCUGGAG   | 37.96 | 2.68 |
| 1159 | UCUGGGAUCAAGCUAUCUAUAUAAGUCCUUGAUUCUGUGUGGGUUCAA    | 37.98 | 1.72 |
| 1160 | AGCACCCUGGCCAAGGUCAUCCAUGACAACUUUGGUAUCGUGGAAGGAC   | 38.40 | 2.18 |
| 1161 | UUGUUAGAAAACAAAGCUUUUUUGUAUUGGUUAAACUCGAGUGGUGAUUG  | 38.52 | 1.96 |
| 1162 | GUUAAGGGUUAGUUUACAAUCAGCCACAUUCUAGGUAGGGGCCACUUCA   | 38.60 | 5.11 |
| 1163 | CAUCUCUUGUAUAUGAUGAUCUGGAUCCACCAAGACUUGUUUUAUGCUC   | 38.66 | 1.58 |
| 1164 | UCACAUUCUAUUCUGAAAUUCGAGAACUAGUGAAAUUAAGGAAAGAAUA   | 38.80 | 2.04 |

|      |                                                     |       |      |
|------|-----------------------------------------------------|-------|------|
| 1165 | GCUGAGAACGGGAAGCUUGUCAUCAUGGAAAUCCCAUCACCAUCUCCA    | 38.86 | 1.51 |
| 1166 | GGUACGAUAACCGGGAGAUAGUGAUGAAGUACAUCCAUUAUAAGCUGUCG  | 38.93 | 2.99 |
| 1167 | UAUUGUUUUCAGGGGGCCUAUGGCUAAAUCAAAUUAACCUACCCCGCAUA  | 38.93 | 1.60 |
| 1168 | UUGCCCUCAACGACCACUUUGUCAAGCUCAUUUCUGGUAUGACAACGAA   | 38.95 | 1.79 |
| 1169 | ACAUUUCGAGGUGGACAUCACUUCGUGAGUACUUCGAAAUGUCCGUUC    | 39.11 | 1.37 |
| 1170 | CGAGGUGGACAUCACUUACGCUGAGUACUUCGAAAUGUCCGUUCGGUUGG  | 39.23 | 0.54 |
| 1171 | GACAACAUCGCCUGUGGAUGACUGAGUACCUGAACCGGCACCUGCACAC   | 39.33 | 1.19 |
| 1172 | CAUCACGGUUUUGGAAUGUUUACUACACUCGGAUUUUUGAUUUGGGAUU   | 39.39 | 1.77 |
| 1173 | AUUUGAUUUGUGGAUUUCGAGUCGUCUUAUUGUAUAGAUUUGAAGAAGAG  | 39.57 | 1.31 |
| 1174 | CAUAUGAAUUGUACAGAAUUAUUUCUAUUGAAUUCGGAACUGUCCUUUCCU | 39.61 | 1.39 |
| 1175 | AAAAGAGAUCGUGGAUUACGUCGCCAGUCAAGUAACAACCGCGAAAAAGU  | 39.63 | 1.58 |
| 1176 | CUGUUGACCUUUAAAUGAUUGUCUGAACACAUAACUCGAGUGGUGAUUG   | 39.73 | 4.47 |
| 1177 | ACUUAGACUUGACCUAUUUUAUCCAAAUAUUUAUUGCUAUGGGAUUUCU   | 39.74 | 1.82 |
| 1178 | GAUUCAAAGCAUAAAACCAUUACAAGAUUAACAUCUAUGUGCUGAGAG    | 40.00 | 2.34 |
| 1179 | CUUAGCACCCUGGCCAAGGUCAUCCAUGACAACUUUGGUAUCGUGGAAG   | 40.44 | 1.75 |
| 1180 | AGGACUCUCUUUUUCCUCUUCUGGUAGUUGUAUUGACCACUCCCAUAAG   | 40.73 | 1.68 |
| 1181 | UCAACAUAGACUACAUUCAGAUUGGAGGAAAGGAAACCGUUCUGACCCA   | 40.73 | 3.61 |
| 1182 | GGUGAAGCUAAUCUGGAAAUGGAGGAACCAGAAGAAUCAUUGAACACUCU  | 40.74 | 1.41 |
| 1183 | ACCCCUAACAGUGCCAGAAUAAGGCAUUUCUCUAUUGUUUUCAGGGGGCC  | 40.74 | 0.97 |
| 1184 | GUCAUCCAUGACAACUUUGGUAUCGUGGAAGGACUCAUGACCACAGUCCA  | 40.92 | 2.90 |
| 1185 | UGUUUUCAGGGGGCCUAUGGCUAAAUCAAAUUAACCUACCCCGCAUAGGG  | 41.15 | 2.41 |
| 1186 | GUUGCGCGGAGGAGUUGUGUUUGUGGACGAAGUACCGAAAGGUCUUACCG  | 41.16 | 0.81 |
| 1187 | CUCUAACUUCAAGGCCAUUUCUGUGAAAUGCUGGCAUUUGCACCUACCU   | 41.22 | 1.58 |
| 1188 | AGCUCAUUUCUGGUAUGACAACGAAUUUGGCUACAGCAACAGGGUGGUG   | 41.32 | 1.46 |
| 1189 | UCUGAUUGACAAUACGAUUUAUCUAAUUUACACGAAUUGCUUCUGGUG    | 42.12 | 1.67 |
| 1190 | GGACUCUCUUUUUCCUCUUCUGGUAGUUGUAUUGACCACUCCCAUAAGG   | 42.19 | 1.33 |
| 1191 | CCCUUCAUUGACCUCAACUACAUGGUUUACAUGUUCCAAUAUGAUUCCA   | 42.47 | 1.17 |
| 1192 | CUUCUUCGCCAAAAGCACUCUGAUUGACAAAUACGAUUUAUCUAAUUUAC  | 42.74 | 1.67 |
| 1193 | UCCUAUGAUUAUGUCCGGUUAUGUAAACAUCGGAAGCGACCAACGCCU    | 43.01 | 1.29 |
| 1194 | UUAGCAUUUUGAAAGUUGUUGAAACAGGAAGCAAGUUUUUCUGUCAGGAA  | 43.26 | 2.02 |
| 1195 | UCAAGACCCUUCGUUCUUUAACCACGUUCUUGAAAUCAGGGUCCCAAC    | 43.39 | 2.43 |
| 1196 | UAGAAAACCGCCAAUAUGAUGACAUCAAGAAGGUGGUGAAGCAGGCG     | 43.74 | 2.74 |
| 1197 | GUUCUUCGAGUUAAGGGUJAGUUUACAUCAGCCACAUUCUAGGUAGGGG   | 43.74 | 2.99 |
| 1198 | GAACCAUGAGAAGUAUGACAACAGCCUCAAGAUCUAGCAAUGCCUCCU    | 43.81 | 1.54 |
| 1199 | UUAGCACUGACUGAAGAACUCUUGGGACAAGGAUAUAUUUUUAAAUCA    | 44.10 | 1.17 |
| 1200 | AGUGGCAUCUGUUUUGUAGGCUACAAGAACUAUCGGUACCGUGCUGGCUU  | 44.34 | 1.44 |
| 1201 | GUGCGUCAGAAGCACCCAGGACUCCAUUUGCUUUUGUCCCGGGGCUCCAC  | 44.38 | 3.12 |
| 1202 | CAUCAUUGACCCCUUCAUUGACCUCAACUACAUGGUUUACAUGUUCCAAU  | 44.56 | 0.59 |
| 1203 | CCUGCCGUCUAGAAAAACCGGCCAAAUAUGAUGACAUCAAGAAGGUGGUG  | 44.79 | 3.17 |
| 1204 | GAGCUGUUUCUGAGGAGCCUUCAGGAUUACAAGAUUCAAGUGCGCUGCU   | 44.84 | 3.30 |
| 1205 | UGUUUGGAGAUGUAAGAAAUGUUCUUGCAGUUAAGGGUJAGUUUACAUAU  | 45.29 | 5.74 |
| 1206 | UGACCCCUUCAUUGACCUCAACUACAUGGUUUACAUGUUCCAAUAUGAUU  | 45.54 | 1.84 |

|      |                                                          |       |      |
|------|----------------------------------------------------------|-------|------|
| 1207 | GUUUGGGAGAUGUAAGAAAUGUUCUUGCAGUUAAGGGUUAGUUUACAAUC       | 45.58 | 4.45 |
| 1208 | CUGUUGGUGGAUGAGCAAGAGACCUUGC UU AUUAGAAACAAAGUUUAAAC     | 45.63 | 2.95 |
| 1209 | CCUACCCCGCAUAGGGGCGUGGACUCUACAAUAGAACUUCACCCAAGGGG       | 45.96 | 1.93 |
| 1210 | GAUUCCACCCAUGGC AAAU UCCAUGGCACCGUCAAGGCUGAGAACGGGAA     | 46.07 | 3.31 |
| 1211 | AAAAACCUGCCAAAU AUGAUGACAUCAAGAAGGUGGUGAAGCAGGCGUCG      | 46.18 | 9.84 |
| 1212 | GUGAACUGGGGGAGGAUUGUGGGCCUUCUUUGAGUUCGGUGGGGUGAUGUG      | 46.19 | 1.14 |
| 1213 | GCCGUCUAGAAAAACCUGCCAAAU AUGAUGACAUCAAGAAGGUGGUGAAG      | 46.33 | 4.34 |
| 1214 | UUUUAACUCAAUUUUCCAUGAAAAUGCAACAACAUGUAUAAU AUUUUU        | 46.48 | 0.76 |
| 1215 | GGGAGGAGGAUGGGGAGUAGGACAUACCAGCUUAGAUUUUUAAGGUUUUUA      | 46.51 | 4.49 |
| 1216 | CGCCAAAAGCACUCUGAUUGACAAAUACGAUUUAUCUAAUUUACACGAAA       | 47.07 | 1.32 |
| 1217 | AAUGAAGGU AUUU AAGCAUUUCCACAGCCAUUGAUUGAAUGCCGCAAUCU     | 47.47 | 6.28 |
| 1218 | CCACCCAUUGAUGUGAU AUUUUAGCAUUUUGAAAGUUGUUGAAACAGGAA      | 47.70 | 3.03 |
| 1219 | UAUUAAACAAUCAAAACUCUUUCACUGUUUUAUAAAAAUUUUGCUUUUAA       | 47.96 | 0.41 |
| 1220 | AAGGCUGAGAACGGGAAGCUUGUCAUCA AUGGAAAUCCCAUCACCAUCUU      | 48.27 | 5.06 |
| 1221 | UAGUGAUGAAGUACA UCCA UUAU AAGCUGUCGCAGAGGGGCUACGAGUGG    | 48.45 | 1.24 |
| 1222 | GGUGAACUGGGGGAGGAUUGUGGGCCUUCUUUGAGUUCGGUGGGGUGAUGU      | 48.60 | 1.45 |
| 1223 | GU AUUACCGAGUAAUGAUCUUAUUAACAAUCAAAACUCUUUCACUGUUUU      | 48.84 | 4.54 |
| 1224 | GUUUUUGGU AUUGAUUGUAGUGUGUGUCCUACCAUCUCUAAUAGACAUAA      | 48.96 | 2.06 |
| 1225 | GAAGAAGCAAUUGGAUGCUUCUUUCCACGAUUGAAGUAUUUACUUGCUCU       | 49.08 | 1.31 |
| 1226 | GCCUGACUCAGACUGACA UUCUCCACUUCUUGUUC CCCACUGACAGCCUC     | 49.24 | 0.86 |
| 1227 | GGUGUGAGCAGUGUCAGAGUGUGGUAAGCCUGAU AUCGUGUUUUUCGGU       | 49.42 | 1.70 |
| 1228 | CCUGGGAGCUCUCCUUGGAACCAUUCUGAAA UUAUUUAAAGGGGUUGG        | 49.51 | 1.59 |
| 1229 | CCCUGUUGGUCGGUGGGUUGGUAGUUUCUACAGUUGGGCAGCUGGUUAGG       | 49.68 | 0.97 |
| 1230 | UCGGCCCAGCCUCCUGGUGGAGAAGAUCAAUCU AUUUGCCAUGUUUGGCA      | 49.75 | 1.67 |
| 1231 | UCCACAGCCAUUGAUUGAAUGCCGCAAUCU AUACAACAUGUCUAAAAUU       | 49.77 | 6.92 |
| 1232 | ACCACUUUGUCAAGCUC AUUUCUGGUAUGACAACGAAUUGGCUACAGC        | 49.95 | 2.49 |
| 1233 | GCGGAGGAGUUGUGUUUGUGGACGAAGUACCGAAAGGUCUUACCGGAAAA       | 50.27 | 1.37 |
| 1234 | AGGGUCAACAUCUUUUACA UUCUGCAAGCACAUCUGCAUUUUCACCCAC       | 50.33 | 2.74 |
| 1235 | UGAGCAGACGGAGUAUGCCACCAUUGUCUUUCUAGCGGAAUGGGCACCU        | 50.48 | 2.75 |
| 1236 | CAAGGUCAUCAUGACAACU UUGGUAUCGUGGAAGGACUCAUGACCACAG       | 50.52 | 3.88 |
| 1237 | UGGAUGAGCAAGAGACCUUGC UU AUUAGAAACAAAGUUUAAACUGGUGAU     | 51.16 | 2.08 |
| 1238 | UUCUGACCCAUCAUAAGUUUGAAGAAGCAAUUGGAUGCUUCUUCCACGA        | 51.25 | 1.95 |
| 1239 | GAUGGAGGAAAGGAAACCUGUUCUGACCCAUCAUAAGUUUGAAGAAGCAA       | 51.33 | 4.05 |
| 1240 | AUUGUUUUUCAGGGGGCCU AUGGC UAAAUC AAAUUAACCUACCCCGCAUAG   | 51.33 | 1.68 |
| 1241 | GAUUUUUUAUGGGGAAGUAAGGACCAGAGAUAAAAAGGGAGUAACU AUUC      | 51.43 | 2.24 |
| 1242 | CUGCUUUUAACUCUGGUA AAGUGGAU AUUGUUGCCAUCA AUGACCCCUUC    | 51.56 | 4.64 |
| 1243 | ACUCUGGUAAAGUGGAU AUUGUUGCCAUCA AUGACCCCUUCAUUGACCUC     | 52.10 | 0.62 |
| 1244 | CCUGGU AUGACAACGAAU UUGGCUACAGCAACAGGGUGGUGGACCUCAUG     | 52.27 | 1.36 |
| 1245 | ACUCCCAGGUGUGAGCAGUGUCAGAGUGUGGUA AAGCCUGAU AUCGUGUU     | 52.37 | 2.80 |
| 1246 | UCUUAACAAAUGUAUGAUUACAUCAAGGCUUCAAAAAUACUCACAUGGC        | 52.41 | 4.28 |
| 1247 | CCCCUUC CUGUGGUUCU AUUUAU AUUUA AUUUA AUUUA AUUUAUGAGAGC | 52.74 | 4.62 |
| 1248 | CCCCUCAGCCGUGCCUGUGUUCUCUGUGGACUAUGGGGAGCUGGAUUUCC       | 52.96 | 1.46 |

|      |                                                      |       |      |
|------|------------------------------------------------------|-------|------|
| 1249 | UGUGUGUGAGAGGUCCUAUGAUUAUGUCCGGUUAUGUAAACAAUCCGGAA   | 53.06 | 1.50 |
| 1250 | CUGCCAAUAUGAUGACAUCAAGAAGGUGGUGAAGCAGGCGUCGGAGGGC    | 53.20 | 4.69 |
| 1251 | GGGGCCUCUAACCACCAUAGCCUCUAACCACCAUAGCCUCUAACCACCAU   | 53.48 | 1.54 |
| 1252 | AGAGUGCAUUGUGAGGGUUAUGAAUAAUGUACAUCUGGCCUUGAAACC     | 53.59 | 2.67 |
| 1253 | UUACAAAGUAUJAGAACCUIUAAGAAGUUAUGAACUCGAGUGGUGAUUG    | 54.25 | 5.24 |
| 1254 | AUUGCAGAAAUCAAAUAGAUUCAACAUAGACUACAUIUCCAGAUGGAGGAA  | 54.27 | 3.99 |
| 1255 | GAUUUCGAGUCGUCUUAUUGUAUAGAUUUGAAGAAGAGCUGUUUCUGAGG   | 55.31 | 5.77 |
| 1256 | AGGUGGCAUGGAUUUUGACUCCAAGAAGGCUUACAGGGACGUGGCCUGGC   | 55.36 | 3.47 |
| 1257 | UCAUGAACUCCUCUGGAUCUACUGGUCUGCCUAAAGGUGUCGCUCUGCCU   | 55.99 | 0.00 |
| 1258 | GAUAGUGAUGAAGUACAUCAUCCAUAUAAGCUGUCGCAGAGGGGCUACGAGU | 56.01 | 0.15 |
| 1259 | CCUGGCCAAGGUCAUCAUGACAACUUGGUAUCGUGGAAGGACUCAUGA     | 56.25 | 2.65 |
| 1260 | CCUUAUUUAUUUCCGCAAUUAUAGAGCGAGCACUUGCUGAAGGCAGGUG    | 56.90 | 5.78 |
| 1261 | CUGAAUACAAAUCACAGAAUCGUCGUUAGCAGUGAAAACUCUCUCAAUU    | 56.90 | 0.93 |
| 1262 | CAAAACCCCUAACAGUGCCAGAAUAAGGCAUUUCUCUAUUGUUUUCAGGG   | 56.94 | 0.61 |
| 1263 | GUGGAUGAGCAAGAGACCUUGCUIUAUUGAAACAAGUUUAAACUGGUGA    | 57.03 | 7.00 |
| 1264 | CGAACGACAUUUUAUUAUGAACGUGAAUUGCUCACAGUAUGGGCAUUUCG   | 57.08 | 3.29 |
| 1265 | ACUCGACGCAAGAAAAUCAGAGAGAUCCUCAUAAAGGCCAAGAAGGGCG    | 57.43 | 3.55 |
| 1266 | UGACAUCAAAGUAGAGUUCUCCACAAACAGAACAAGAUGCUCAAAAAGG    | 57.87 | 1.08 |
| 1267 | GAGGGUUAUUGAAAUAUUGUACAUCUGGCCUUGAAACCACCUUUUAUUAC   | 58.46 | 2.03 |
| 1268 | AGAGGUCCUAUGAUUAUGUCCGGUUAUGUAAACAAUCCGGAAGCGACCAA   | 59.61 | 1.64 |
| 1269 | GAAUACAAAUCACAGAAUCGUCGUUAGCAGUGAAAACUCUCUCAAUUUCU   | 59.82 | 0.61 |
| 1270 | CCAUGAGAAGUAUGACAACAGCCUCAAGAUCUAGCAAUGCCUCCUGCA     | 61.07 | 5.80 |
| 1271 | UCGUUAGCAGUGAAAACUCUCUCAAUUCUUUAUGCCGGUGUUGGGCGCG    | 61.43 | 1.71 |
| 1272 | AGUGAUGAAGUACAUCAUCCAUAUAAGCUGUCGCAGAGGGGCUACGAGUGGG | 61.94 | 2.53 |
| 1273 | GUGAGAGGUCCUAUGAUUAUGUCCGGUUAUGUAAACAAUCCGGAAGCGAC   | 61.97 | 1.73 |
| 1274 | AAUAAAACAAAAAAAUUUUACCAAAGAGAAAUUUGUUUUUAUUUAUUU     | 62.59 | 3.71 |
| 1275 | UAUGAAACGAUAUGGGCUGAAUACAAAUCACAGAAUCGUCGUUAGCAGUG   | 63.05 | 1.90 |
| 1276 | UGGAGAGGCAGAGAUGGACUCCUGAGGAAUUUAUUCACCCAGACCCUGG    | 63.35 | 1.34 |
| 1277 | AGAAGUAUGACAACAGCCUCAAGAUCUAGCAAUGCCUCCUGCACCACC     | 63.51 | 3.76 |
| 1278 | CAAGGAUAUGGGCUCACUGAGACUACAUCAGCUAUUCUGAUUACACCCGA   | 64.03 | 1.48 |
| 1279 | GGGGUGAACUGGGGGAGGAUUGUGGCCUUCUUUGAGUUCGGUGGGGUGAU   | 64.40 | 0.62 |
| 1280 | CUUCCUGGCCUUUGGCUUUGUCUCAUCACCUUCAGCUGCCACUUCUAUG    | 64.40 | 1.86 |
| 1281 | UGUGAGCAGUGUCAGAGUGUGGUAAAGCCUGAUUUCGUGUUUUUCGGUGA   | 64.76 | 0.77 |
| 1282 | UUGUUUUCAGGGGGCCUAUGGCUAAAUCAAAUUAACCUACCCCGCAUAGG   | 64.81 | 0.22 |
| 1283 | GGAGCUAUUCUUGCGCAGCUUGCAAGACUUAUAGAUUCAUUCUGCCCUGC   | 65.06 | 7.75 |
| 1284 | CCGGGAGAUAGUGAUGAAGUACAUCAUCCAUAUAAGCUGUCGCAGAGGGGCU | 65.16 | 5.14 |
| 1285 | GGGAUGCAGCAUUAUGAUGUGGGUCAAGGAAUUAAGUUAGGGAAUGGCAC   | 65.23 | 6.27 |
| 1286 | CUUUUACAGAUGCACAUUUCGAGGUGGACAUCACUUAACGCUGAGUACUUC  | 65.24 | 1.42 |
| 1287 | AUCGGCCCAGCCUCCUGGUGGAGAAGAUCAAUCUAUUUGCCAUGUUUGGC   | 65.52 | 5.43 |
| 1288 | UGAUGAAGUACAUCAUCCAUAUAAGCUGUCGCAGAGGGGCUACGAGUGGGAU | 65.62 | 1.88 |
| 1289 | CAAAGACCCUUCGUUCUUUAACCACGUUCUUGAAAUCAGGGUCCCAACU    | 65.82 | 1.18 |
| 1290 | UUUUGGAAUGUUUACUACACUCGGAUUUUGAUUUGUGGAUUUCGAGUCG    | 66.08 | 5.94 |

|      |                                                     |       |       |
|------|-----------------------------------------------------|-------|-------|
| 1291 | CAGGACUCUCUUUUUCCUCUUCUGGUAGUUGUAAUGACCACUCCCAUAA   | 66.34 | 2.65  |
| 1292 | AUUCUAGGCGAUCGCGUGGUUUCGAGAGAAGAAAUCUCGGAUUGAUCUA   | 66.54 | 1.82  |
| 1293 | CUGCAGGCCUAGAGAAGUUUCAGGGAAGGUCAGAAGAGCUCCUGGCUGUG  | 66.97 | 7.95  |
| 1294 | AUUUUUJGGCAAUCAAAUCAUUCGGAUACUGCGAUUUUAAGUGUUGUUC   | 67.14 | 3.64  |
| 1295 | UCGUACAAGUGUCUGAAGGUGCUGGAGAACAUAUAAAAGCAAUGGGCAGGG | 67.28 | 3.85  |
| 1296 | UUUCAAGUUAUUUUUAUGCCUUUUUAUUUCUUAACCAAUGUAUGAUUAC   | 67.93 | 1.24  |
| 1297 | GAGAUAGUGAUGAAGUACAUCCAUAUAAGCUGUCGCAGAGGGGCUACGA   | 68.37 | 0.61  |
| 1298 | CAAGACCGACUACCAGGGCUUCCAAAGCAUGUACACCUUCGUGACUCCC   | 69.14 | 10.06 |
| 1299 | UACUGCGAUUUUAAGUGUUGUCCAUCCAUCACGGUUUUGGAAUGUUUA    | 69.55 | 2.36  |
| 1300 | CUGUGAAAUGCUGGCAUUUGCACCUACCUCACAGAGUGCAUUGUGAGGGU  | 69.84 | 7.32  |
| 1301 | GAGUGGCAUCUGUUUUGUAGGCUACAAGAACUAUCGGUACCGUGCUGGCU  | 70.58 | 3.59  |
| 1302 | CUCCGUGAGUGGCAUCUGUUUUGUAGGCUACAAGAACUAUCGGUACCGUG  | 70.93 | 5.02  |
| 1303 | AGUGUUUAUUGUGUCAUUUGUCUUUGUCUAGGAGAGGACAGGACUCUCU   | 71.13 | 8.63  |
| 1304 | GCUGGCAUUUGCACCUACCUCACAGAGUGCAUUGUGAGGGUUAUGAAU    | 71.63 | 2.22  |
| 1305 | GGAACCGCUGGAGAGCAACUGCAUAAGGCUAUGAAGAGAUACGCCUGGU   | 72.28 | 0.62  |
| 1306 | UACUUGCUCAGUAACGGUCUUUAUUACAAAGUAUUAGAACCUUUAAGAAG  | 73.01 | 4.02  |
| 1307 | GGAGAUAGUGAUGAAGUACAUCCAUAUAAGCUGUCGCAGAGGGGCUACG   | 73.87 | 4.72  |
| 1308 | AGUAUGACAACAGCCUCAAGAUAUCAGCAAUGCCUCCUGCACCACCAAC   | 73.88 | 3.17  |
| 1309 | CGGGAGAUAGUGAUGAAGUACAUCCAUAUAAGCUGUCGCAGAGGGGCUA   | 74.29 | 7.70  |
| 1310 | ACAAGCAACUGAAUCUCAUUUCUUCAGCUUGAAGAAGUGAUCUUGGCCAA  | 74.62 | 2.19  |
| 1311 | CAUCGUUGACCGCCUGAAGUCUCUGAUUAAGUACAAGGCUAUCAGGUGG   | 75.04 | 1.22  |
| 1312 | CCUCUUCUGGUAGUUGUAAUGACCACUCCAUAAAGGCUAUAACUGUUC    | 75.10 | 15.33 |
| 1313 | AGGGUUAUGAAUAAUGUACAUCUGGCCUUGAAACCACCUUUUAUUACA    | 75.99 | 3.29  |
| 1314 | CAAAGAGGCGAACUGUGUGUGAGAGGUCCUAUGAUUAUGUCCGGUUAUGU  | 76.65 | 3.10  |
| 1315 | UGAUGUAGUAAGGUUUUUGGAUUCAAAGCAUAAAACCAUUACAAGAUU    | 78.21 | 1.45  |
| 1316 | GAUAUGUGGAUUUCGAGUCGUCUUAUUGUAUAGAUUUGAAGAAGAGCUGU  | 79.54 | 2.99  |
| 1317 | ACUGGGCACAGUGAUGAUGAGCCCAAGAGAAUCAAGAAGAGCAAGAUGAU  | 80.23 | 4.94  |
| 1318 | AUGUCAGAAUUAAAAAUUCUUUAACUUAACUAAAAACACUAUCCAACAA   | 80.72 | 4.18  |
| 1319 | GGGAUCCCCUUCUUGUGGUUCUAUUUAUUUAUUUAUUUAUUUAUUUAU    | 81.30 | 4.22  |
| 1320 | UGUCUAGUCAUUUUAUAGUGCCCCACAUUCAAGAACCAGACAACAGGAU   | 81.58 | 4.64  |
| 1321 | UAAAUUUUAUGCCUUUUUAUUUCUUAACAAAUGUAUGAUUACAUCAAGGC  | 82.26 | 1.01  |
| 1322 | GGGAGAUAGUGAUGAAGUACAUCCAUAUAAGCUGUCGCAGAGGGGCUAC   | 82.74 | 5.35  |
| 1323 | CAGAGGGUACAUGACUCUGUUCUCCAUCAAGAGCAACCACCCUGGGCUUC  | 83.10 | 11.76 |
| 1324 | CGUCAUAGAAGAAUAGAUUAGAAACGUCCACAAGAGUAAGUGUGCUUUG   | 83.13 | 5.78  |
| 1325 | UCUAUGUGCUGAGAGACAUUAUGACACCGCCAAAUUUAACUGCAGAGUUG  | 84.53 | 7.10  |
| 1326 | GUCUAAAAUUUAAGGUUUUCAUUCAAAUGAAAAUUAUUUUUAGCACUGA   | 84.61 | 11.22 |
| 1327 | CGUGAGUGGCAUCUGUUUUGUAGGCUACAAGAACUAUCGGUACCGUGCUG  | 84.82 | 5.63  |
| 1328 | GCUCAACAUGGGGCCCGGGUUCCAAAGUUUGCAAAGUUGGGAGUCGAGGG  | 85.29 | 3.75  |
| 1329 | CAUCGUGGACCGGCUGAAGAGCCUGAUCAAUAACAAGGGCUACCAGGUAG  | 85.59 | 10.39 |
| 1330 | GCCGCAAUCUAUACAAACAUGUCUAAAAUUUAAGGUUUUCAUUCAAAUA   | 86.86 | 2.30  |
| 1331 | CCUGCAGGCCUAGAGAAGUUUCAGGGAAGGUCAGAAGAGCUCCUGGCUGU  | 87.60 | 2.91  |
| 1332 | UCACUGUUUUUAUAAAAAUUUUGCUUUUAUUAAAUGGUCUUGUUAGAAA   | 87.73 | 10.46 |

|      |                                                              |        |       |
|------|--------------------------------------------------------------|--------|-------|
| 1333 | CCUGUCCUGUGUCAUCAUCUUUGUCAUUGUGUACUAUGCCUUGAUGGCUG           | 87.81  | 10.74 |
| 1334 | UGAACUGGGGGAGGAUUGUGGCCUUCUUUGAGUUCGGUGGGGUCAUGUGU           | 87.88  | 0.59  |
| 1335 | UUGCUCAGUAACGGUCUUUUAUUAACAAGUAUUAGAACCUUUAAGAAGUUA          | 88.19  | 12.32 |
| 1336 | UUUGUGCAUUUGGGGGGAAUUCAUCUCUCUUUAUAUAAAGUUGGAUGCG            | 88.20  | 4.50  |
| 1337 | AUAGUGAUGAAGUACAUC <b>CAUUAUAAGCUGUCG</b> CAGAGGGGCUACGAGUG  | 90.70  | 1.38  |
| 1338 | GGUGGAGAAGAUCAAUC <b>UAUUUGCCAUGUUUGGC</b> ACUGGCAUUGCCAUGA  | 91.39  | 9.76  |
| 1339 | UGUCAUCAUCUUUGUCAUUGUGUACUAUGCCUUGAUGGCUGGAGUAGUCU           | 91.85  | 5.13  |
| 1340 | AGUGAAAACUCUCUCAAUUCUUUAUGCCGGUGUUGGGCGCGUUAUUUAU            | 92.53  | 10.73 |
| 1341 | GCGGUGGUGUUGUGUUCGUGGACGAGGUGCCUAAAGGACUGACCGGCAAG           | 94.38  | 8.92  |
| 1342 | CCUGAAGUCUCUGAUUAAGUACA <b>AAAGGCUAUCAGG</b> UGGCUCCCGCUGAAU | 94.69  | 1.53  |
| 1343 | AUGAGGGCUGUUUGCCCUUUUCUGUGCCA <b>AAUGAGUG</b> CCCUUUUCUGGCAC | 95.21  | 7.33  |
| 1344 | CUUGGGACAAAGGAUAUAUUUUUAAAUCAUUAUGCUCGAGUGGUGAUUG            | 95.73  | 6.53  |
| 1345 | AAAGAUCAUCAUCAUGGAUAGCAAGACCGACUACCAGGGCUUCCAAAGCA           | 96.63  | 16.25 |
| 1346 | GAUGGACCUGUUGCGGGUUUGGCUUUUGACCUC <b>AAUGAACCCUCAGCUGA</b>   | 97.51  | 4.08  |
| 1347 | CUUCGAGGAGGAGCUAUUCUUGCGCAGCUUGCAAGACUAUAAGAUUCAAU           | 101.21 | 4.07  |
| 1348 | CAUUUGGGGGGAAUUCAUCUCUCUUUAUAUAAAGUUGGAUGCGGAACCC            | 102.25 | 4.03  |
| 1349 | CAUCAGAGGGGUCAUGACUCUGUUC <b>CAUCAAGAGCAACC</b> ACCCUGGGC    | 103.05 | 1.77  |
| 1350 | ACAUAUCGAGGUGGACA <b>UUACCUACGCCGAGUACU</b> UCGAGAUGAGCGUUC  | 106.40 | 15.37 |
| 1351 | UUCGAGAUGAGCGUUCGGCUGGCAG <b>AAGCUAUGAAG</b> CGCUAUGGGCUGAA  | 109.21 | 8.64  |
| 1352 | GCUCUCCUUGGAACCCAU <b>UCCUGAAAUAUUUAAAG</b> GGGUUGGCCGGGCU   | 109.88 | 8.13  |
| 1353 | GAGCUCUCCUUGGAACCCAU <b>UCCUGAAAUAUUUAAAG</b> GGGUUGGCCGGG   | 113.42 | 1.88  |
| 1354 | UCUCUCCAAAUUUUAAGGUGAAGUUAU <b>ACUUCACAAAAC</b> AGUAGAGGAG   | 116.70 | 8.50  |
| 1355 | GCAGGCCUAGAGAAGU <b>UUCAGGGAAGGUCAGAAG</b> AGCUCCUGGCUGUGGU  | 119.88 | 2.99  |

<sup>1</sup> Shown are mRNA sequences containing 20-nucleotide target sites (in bold) and the flanking regions.

<sup>2</sup> N=3.

**Supplementary Table 2.** Sequence and modification pattern of sdRNAs in Figure 6.

| Name                       | Sequence <sup>1,2</sup>                                             |
|----------------------------|---------------------------------------------------------------------|
| MAP4K3149 (14-2'-O-methyl) | P.mU.mA.mG.mA.fC.fU.fU.fC.fC.mA.mC#mA#mG# <b>mA</b> #mA#fC#fU#fC#fU |
| MAP4K3149 (14-2'-OH)       | P.mU.mA.mG.mA.fC.fU.fU.fC.fC.mA.mC#mA#mG# <b>A</b> #mA#fC#fU#fC#fU  |

<sup>1</sup> m= 2'-O-methyl (2'-ribose modification), f= 2'-fluoro (2'-ribose modification), #= phosphorothioate (backbone modification), P= phosphate.

<sup>2</sup> Position 14 is shown in bold.
